# Supplementary material
Source: HighWire-hosted journal article supplement (https://www.cmajopen.ca/highwire/filestream/89320/field_highwire_adjunct_files/2/open-2021-0119-3-at.pdf)
Supplement: open-2021-0119-3-at.pdf [file open-2021-0119-3-at.pdf]

### APPENDIX 3: STUDY CHARACTERISTICS

| RCT                                             | Study design (no. randomized)                                                                        | Population                                                                                                                                                                | Stent type         | Treatments                                                                                                                                                                    | Timing of randomization                                                                                                                              | Primary outcome                                                                                                    | Country        | Funding Source                                                                                                                                                                            |
|-------------------------------------------------|------------------------------------------------------------------------------------------------------|---------------------------------------------------------------------------------------------------------------------------------------------------------------------------|--------------------|-------------------------------------------------------------------------------------------------------------------------------------------------------------------------------|------------------------------------------------------------------------------------------------------------------------------------------------------|--------------------------------------------------------------------------------------------------------------------|----------------|-------------------------------------------------------------------------------------------------------------------------------------------------------------------------------------------|
| Mauri 2014 (DAPT; NCT00977938)                  | Multi-centre, placebo-controlled, superiority RCT<br><br>DAPT: 12 months (5786) vs. 30 months (5862) | ≥ 18 yr, PCI with a DES or BMS.                                                                                                                                           | SES, ZES, PES, BMS | ASA 75–162 mg/d+ clopidogrel (75 mg/d) or prasugrel (10 mg/d) for 12 months, followed by continuation on DAPT or discontinuation of P2Y12 inhibitor (ASA continued) for 18 mo | 12 months post PCI for patients with no MACCE, repeat revascularization, or moderate or severe bleeding, and who had been adherent to thienopyridine | Co-primary outcomes: cumulative incidence of definite or probable ST and MACCE (composite of death, MI, or stroke) | Multi-national | Abbott, Boston Scientific, Cordis, and Medtronic, Bristol-Myers Squibb–Sanofi Pharmaceuticals Partnership, Eli Lilly, and Daiichi Sankyo, and the Department of Health and Human Services |
| Valgimigli 2012 (PRODIGY; NCT00611286)          | Multi-centre, open-label, superiority RCT<br><br>DAPT: 6 months (723) vs. 24 months (725)            | ≥ 18 yr; elective, urgent or emergent coronary angioplasty with intended stent implantation; chronic stable coronary artery disease or ACS, including non–STEMI and STEMI | ZES, EES, PES, BMS | ASA (160 to 325 mg orally or 500 mg IV as a loading dose, 80 to 160 mg daily) + clopidogrel (300 or 600 mg orally as a loading dose), then 75 mg/d for 6 or 24 months         | 30d +/- 5 days post PCI                                                                                                                              | Composite: death of any cause, MI, cerebrovascular accident                                                        | Italy          | University of Ferrara                                                                                                                                                                     |
| Collet 2014 (ARCTIC- Interruption; NCT00827411) | Multi-centre, open-label, superiority RCT<br><br>DAPT: 12 months (641) vs. 18–30 months (645)        | ≥ 18 yr; DES implantation                                                                                                                                                 | SES, PES, ZES, EES | ASA (75-100 mg/d) alone or ASA (75-100 mg/d) + clopidogrel (75-150 mg/d) or prasugrel (10 mg/d)                                                                               | 12 mo post PCI for patients who did not have an ischaemic event of the primary endpoint or any event of the primary safety endpoint during           | Composite: death, MI, ST, stroke, urgent revascularization                                                         | France         | Allies in Cardiovascular Trials Initiatives and Organized Networks (ACTION Study Group), Fondation de France, Sanofi - Aventis, Cordis, Medtronic, Boston                                 |

Appendix 3, as supplied by the authors. Appendix to: Elliott J, Kelly SE, Bai Z, et al. Extended dual antiplatelet therapy following percutaneous coronary intervention in clinically important patient subgroups: a systematic review and meta-analysis. *CMAJ Open* 2023. doi:10.9778/cmajo.2021-0119. Copyright © 2023 The Author(s) or their employer(s). To receive this resource in an accessible format, please contact us at [cmajgroup@cmaj.ca](mailto:cmajgroup@cmaj.ca).

|                                    |                                                                                               |                                                                                                                                                        |                                    |                                                                                              |                                                                                                                                                               |                                                                                          |                |                                                                                                                                                                                                                                                     |
|------------------------------------|-----------------------------------------------------------------------------------------------|--------------------------------------------------------------------------------------------------------------------------------------------------------|------------------------------------|----------------------------------------------------------------------------------------------|---------------------------------------------------------------------------------------------------------------------------------------------------------------|------------------------------------------------------------------------------------------|----------------|-----------------------------------------------------------------------------------------------------------------------------------------------------------------------------------------------------------------------------------------------------|
|                                    |                                                                                               |                                                                                                                                                        |                                    |                                                                                              | the first 12 months                                                                                                                                           |                                                                                          |                | Scientific, Fondation SGAM.                                                                                                                                                                                                                         |
| Lee 2014 (DES-LATE; NCT01186146)   | Multi-centre, open-label RCT<br><br>DAPT: 12 months (2514) vs. 24 months (2531)               | ≥ 18 yr; DES implanted ≥ 12 months before enrollment                                                                                                   | SES, PES, ZES, EES and “other DES” | ASA (100 to 200 mg/d) alone or ASA (100 to 200 mg/d) + clopidogrel (75 mg/d)                 | 12-18 mo post PCI for patients with no MACCE or major bleeding since DES implantation, and were receiving dual antiplatelet therapy at the time of enrollment | Composite: death resulting from cardiac causes, MI, or stroke                            | Korea          | CardioVascular Research Foundation, Seoul, Korea, and the Health 21 R&D Project, Ministry of Health & Welfare, Korea                                                                                                                                |
| Gilard 2015 (ITALIC; NCT01476020)  | Multi-centre, open-label, non-inferiority RCT<br><br>DAPT: 6 months (926) vs. 24 months (924) | ≥ 18 yr; PCI with a DES for any indication, with the exception of acute MI and treatment of the left main artery, with confirmed non-resistance to ASA | EES                                | ASA 75 to 325 mg/d + clopidogrel 75 mg/d, prasugrel 60 mg/d, or ticagrelor 90 mg twice daily | During PCI hospitalization; Patients were withdrawn if an endpoint occurred during the first 6 months of DAPT                                                 | Composite: death, MI, urgent target vessel revascularization, stroke, and major bleeding | Multi-national | Abbott Vascular Devices                                                                                                                                                                                                                             |
| Helft 2016 (OPTIDUAL; NCT00822536) | Multi-centre, open-label, superiority RCT<br><br>DAPT: 12 months (697) vs. 18–48 months (701) | ≥ 18 yr with symptoms of stable angina, silent ischemia, or ACS (unstable angina, non-STEMI, or STEMI),                                                | SES, PES, ZES, EES, BES            | ASA (75–160 mg/d) alone or ASA (75–160 mg/d) + clopidogrel (75 mg/d)                         | 12 +/- 3 months post PCI for patients who had not experienced MACCE or major bleeding event in the first 12 months post PCI                                   | Composite: death, MI, stroke, major bleeding                                             | France         | Assistance Publique-Hôpitaux de Paris (Département de la Recherche Clinique et du Développement), Programme Hospitalier de Recherche Publique-PHRC 2008, and unrestricted research grants from Federation française de Cardiologie, Cordis, Boston, |

Appendix 3, as supplied by the authors. Appendix to: Elliott J, Kelly SE, Bai Z, et al. Extended dual antiplatelet therapy following percutaneous coronary intervention in clinically important patient subgroups: a systematic review and meta-analysis. *CMAJ Open* 2023. doi:10.9778/cmajo.2021-0119. Copyright © 2023 The Author(s) or their employer(s). To receive this resource in an accessible format, please contact us at [cmajgroup@cmaj.ca](mailto:cmajgroup@cmaj.ca).

|                                                                                                                                                                                                                                                                                                                                                                                                                                                                                                                                                                                                                                                                                                                                       |                                                                                         |                                                            |     |                                                                                  |                                |                                                            |       |                                                            |
|---------------------------------------------------------------------------------------------------------------------------------------------------------------------------------------------------------------------------------------------------------------------------------------------------------------------------------------------------------------------------------------------------------------------------------------------------------------------------------------------------------------------------------------------------------------------------------------------------------------------------------------------------------------------------------------------------------------------------------------|-----------------------------------------------------------------------------------------|------------------------------------------------------------|-----|----------------------------------------------------------------------------------|--------------------------------|------------------------------------------------------------|-------|------------------------------------------------------------|
|                                                                                                                                                                                                                                                                                                                                                                                                                                                                                                                                                                                                                                                                                                                                       |                                                                                         |                                                            |     |                                                                                  |                                |                                                            |       | Medtronic, Terumo, and Biotronik                           |
| Nakamura 2017 (NIPPON; NCT01514227)                                                                                                                                                                                                                                                                                                                                                                                                                                                                                                                                                                                                                                                                                                   | Multi-centre, non-inferiority, open-label RCT<br><br>DAPT: 6 mo (1654) vs. 18 mo (1653) | 21–79 yr, with coronary artery disease, including acute MI | DES | ASA (81-162 mg/d) + clopidogrel (75 mg/d) or ticlopidine (200 mg/d) <sup>†</sup> | During hospitalization for PCI | Composite: all-cause mortality, MI, stroke, major bleeding | Japan | Association for Establishment of Evidence in Interventions |
| <p>Note: ACS = acute coronary syndrome, ASA = acetylsalicylic acid, BES = biolimus-eluting stent, BMS = bare-metal stent, DAPT = dual anti-platelet therapy, DES = drug-eluting stent, EES = everolimus-eluting stent, MACCE = major adverse cardiac and cerebrovascular events, MI = myocardial infarction, PCI = percutaneous coronary intervention, PES = paclitaxel-eluting stent, RCT = randomized controlled trial, SES = sirolimus-eluting stent, STEMI = ST-elevation myocardial infarction, ZES = zotarolimus-eluting stent.</p> <p>*Biodegradable polymer-coated DES.</p> <p><sup>†</sup>Less than 3% of patients received ticlopidine.</p> <p>‡Open-label inferred from description of methods; not explicitly stated.</p> |                                                                                         |                                                            |     |                                                                                  |                                |                                                            |       |                                                            |

## P2Y12 INHIBITORS USED AS PART OF DAPT REGIMENS

| Author, year                                                                                                                                                                                                                                                                                                                                                                                                                                                                     | Eligible P2Y12 inhibitors          | Group             | No. (%) of participants                          |                            |                  |                       |
|----------------------------------------------------------------------------------------------------------------------------------------------------------------------------------------------------------------------------------------------------------------------------------------------------------------------------------------------------------------------------------------------------------------------------------------------------------------------------------|------------------------------------|-------------------|--------------------------------------------------|----------------------------|------------------|-----------------------|
|                                                                                                                                                                                                                                                                                                                                                                                                                                                                                  |                                    |                   | Clopidogrel                                      | Prasugrel                  | Ticagrelor       | Other P2Y12 inhibitor |
| Nakamura 2017 (NIPPON) <sup>1</sup>                                                                                                                                                                                                                                                                                                                                                                                                                                              | Clopidogrel, ticlopidine           | 6 mo<br>18 mo     | 1619 (97.9)<br>1605 (97.1)                       | 1 (0.1)<br>3 (0.2)         | NA               | 32 (1.9)<br>44 (2.7)  |
| Helft 2016 (OPTIDUAL) <sup>2</sup>                                                                                                                                                                                                                                                                                                                                                                                                                                               | Clopidogrel                        | 12 mo<br>48 mo    | 100                                              | NR                         | NR               | NR                    |
| Gilard 2015 (ITALIC) <sup>3</sup>                                                                                                                                                                                                                                                                                                                                                                                                                                                | Clopidogrel, prasugrel, ticagrelor | 6 mo<br>24 mo     | 902 (98.9)<br>895 (98.4)                         | 15 (1.6)<br>16 (1.8)       | 1 (0.1)<br>0 (0) | NA                    |
| Mauri 2014 (DAPT) <sup>*4</sup>                                                                                                                                                                                                                                                                                                                                                                                                                                                  | Clopidogrel, prasugrel             | 12 mo<br>30 mo    | 3230 (65.4)<br>3275 (65.2)                       | 1711 (34.6)<br>1745 (34.8) | NA               | NA                    |
| Lee 2014 (DES-LATE) <sup>5</sup>                                                                                                                                                                                                                                                                                                                                                                                                                                                 | Clopidogrel                        | 12 mo<br>24 mo    | 2502 (99.5)<br>2521 (99.6)                       | NR                         | NR               | NR                    |
| Collet 2014 (ARCTIC-INT) <sup>6</sup>                                                                                                                                                                                                                                                                                                                                                                                                                                            | Clopidogrel, prasugrel             | 12 mo<br>18–30 mo | 562 (90.1)<br>569 (89.6)                         | 53 (8.5)<br>54 (8.5)       | NR               | NR                    |
| Valgimigli 2012 (PRODIGY) <sup>7</sup>                                                                                                                                                                                                                                                                                                                                                                                                                                           | Clopidogrel                        | 6 mo<br>24 mo     | 983 (100) <sup>†</sup><br>987 (100) <sup>†</sup> | NA                         | NA               | NA                    |
| <p>Note: DAPT = dual anti-platelet therapy, mo = months, NA = not applicable, NR = not reported.</p> <p>*P2Y12 inhibitor use among randomized participants with an implanted DES.</p> <p><sup>†</sup>At randomization (30 days post PCI). At 6-months post PCI, 83.6% of participants in the 6-month DAPT group were receiving clopidogrel (98.3% among participants with a DES; 39.2% among participants with a BMS), and 99.4% of participants in the 24-month DAPT group.</p> |                                    |                   |                                                  |                            |                  |                       |

## DEFINITION OF DIABETES AMONG THE INCLUDED TRIALS

| Author, year                                                                                                                                                                                                                                          | Definition of diabetes*                                                                  |
|-------------------------------------------------------------------------------------------------------------------------------------------------------------------------------------------------------------------------------------------------------|------------------------------------------------------------------------------------------|
| Nakamura 2017 (NIPPON) <sup>1</sup>                                                                                                                                                                                                                   | "Diabetes mellitus"                                                                      |
| Helft 2016 (OPTIDUAL) <sup>2</sup>                                                                                                                                                                                                                    | "Diabetes mellitus"                                                                      |
| Gilard 2015 (ITALIC) <sup>3</sup>                                                                                                                                                                                                                     | "Type 2 diabetes"                                                                        |
| Mauri 2014 (DAPT) <sup>4</sup>                                                                                                                                                                                                                        | "Diabetes mellitus" (DM); "DM was defined as diet, oral medication, or insulin treated." |
| Lee 2014 (DES-LATE) <sup>5</sup>                                                                                                                                                                                                                      | "Diabetes mellitus"                                                                      |
| Collet 2014 (ARCTIC-INT) <sup>6</sup>                                                                                                                                                                                                                 | "Diabetes"                                                                               |
| Valgimigli 2012 (PRODIGY) <sup>7</sup>                                                                                                                                                                                                                | "Diabetes mellitus"                                                                      |
| *With the exception of the DAPT trial, no definition of diabetes was provided. Terminology used to describe "diabetes" has been captured from the primary publication or publication in which subgroup data for patients with diabetes were reported. |                                                                                          |
